# Supplementary material
Source: ML conference proceedings conference paper supplement (https://openreview.net/forum?id=EmzrA9Ov8F)
Supplement: supplementary_material [file attachment]

Case #FLARE23Ts\_0038(slice #287)

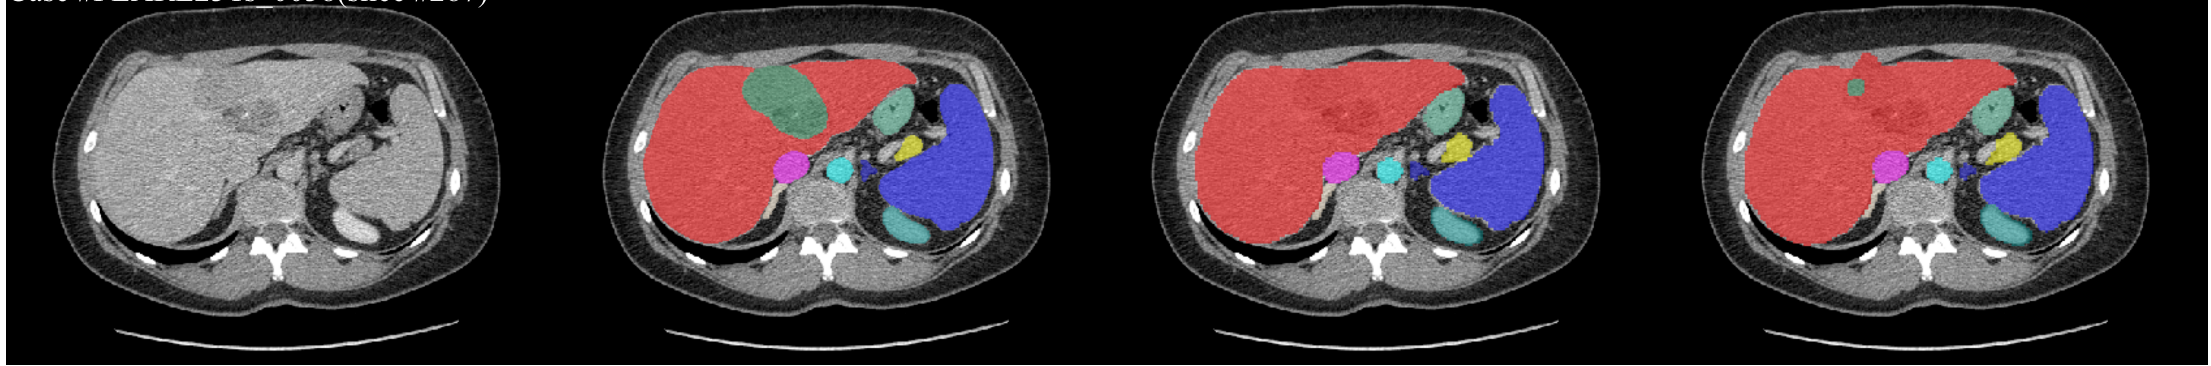

Case #FLARE23Ts\_0043(slice #113)

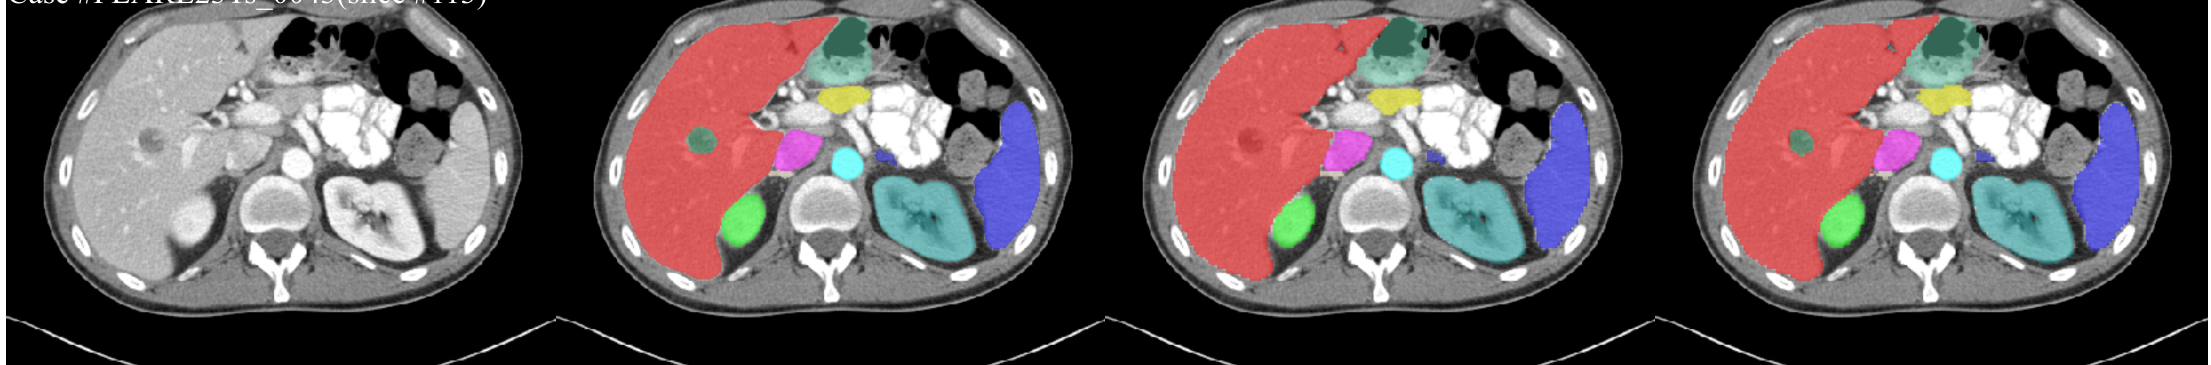

Case #FLARE23Ts\_0057(slice #56)

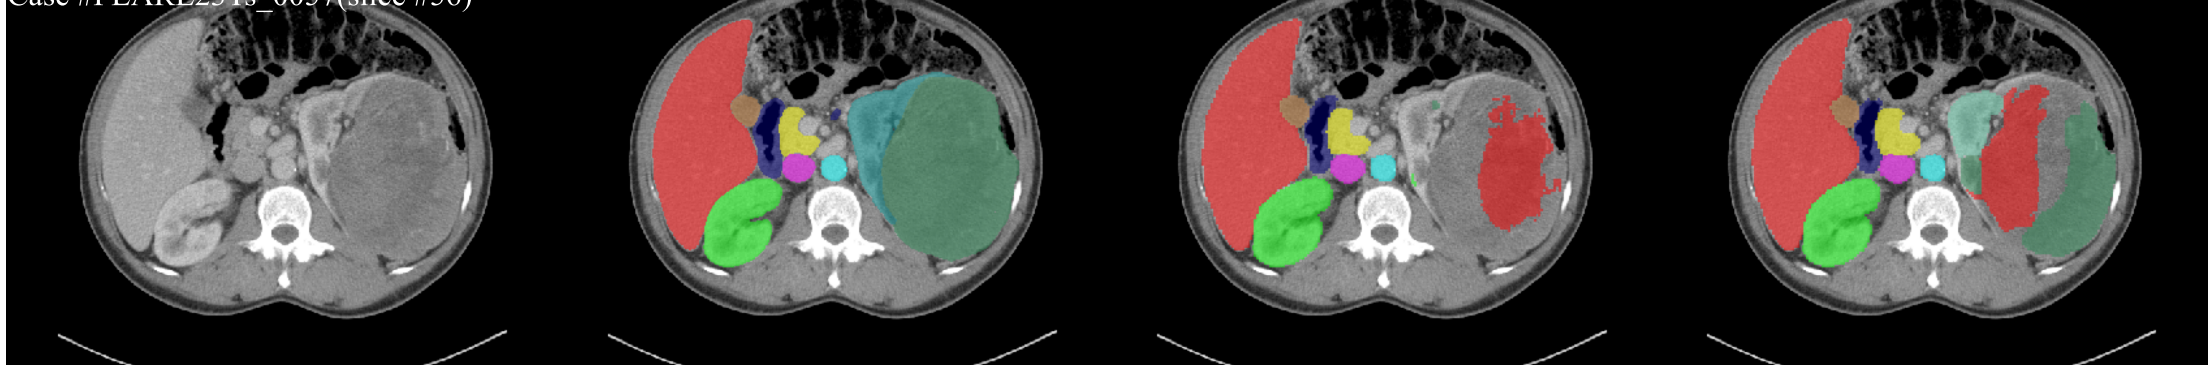

Case #FLARE23Ts\_0067(slice #79)

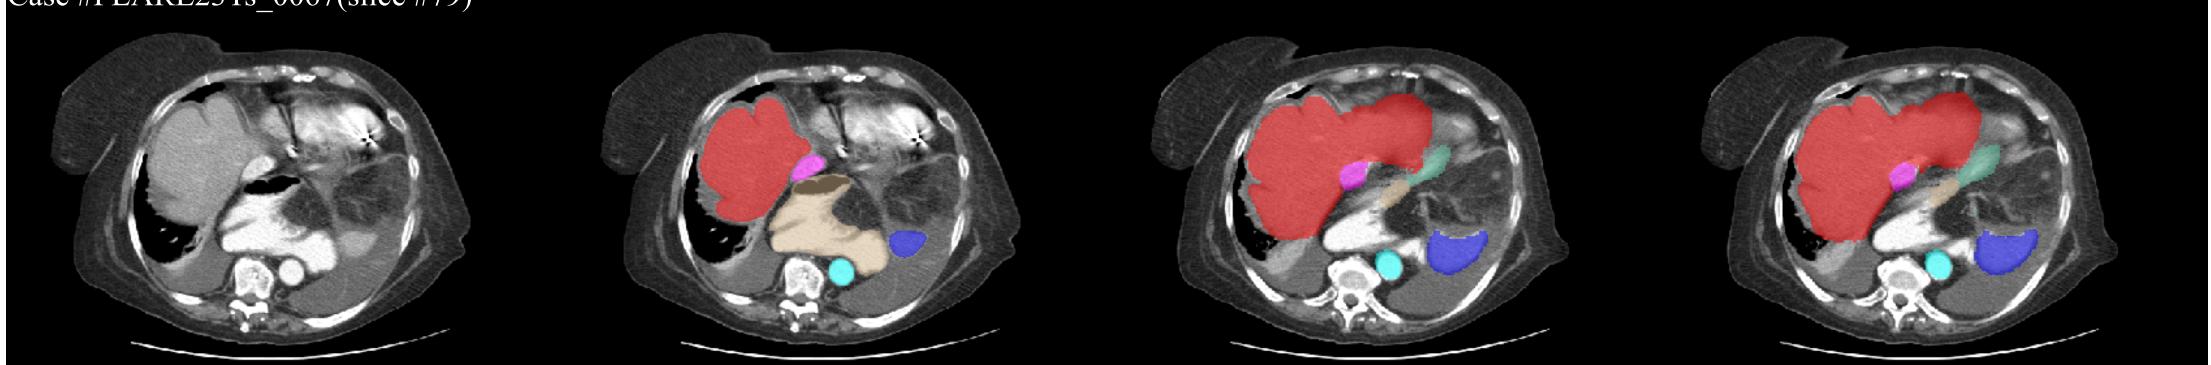

Image

Label

w/o unlabel data

w/ unlabel data
